# Supplementary material
Source: publisher figshare collection journal article supplement (https://frontiersin.figshare.com/ndownloader/files/24743390)

# Supplementary information

**Figure captions**

Supplementary Figure S1. A. Methane concentration vs. salinity in the OT, ESC. Blue points represent the sampling sites in the shelf, green points represent the sampling sites on the upper slope, red points represent the sites on the lower slope.

Supplementary Figure S2. Gridded methane concentrations at 5 m, 100 m, 200 m, 600 m and 900 m water depth. Methane concentrations decrease towards the sea-surface.

Supplementary Figure S3. Horizontal distributions of CH4 saturations (%) in the surface waters of the OT.

Supplementary Figure S1.


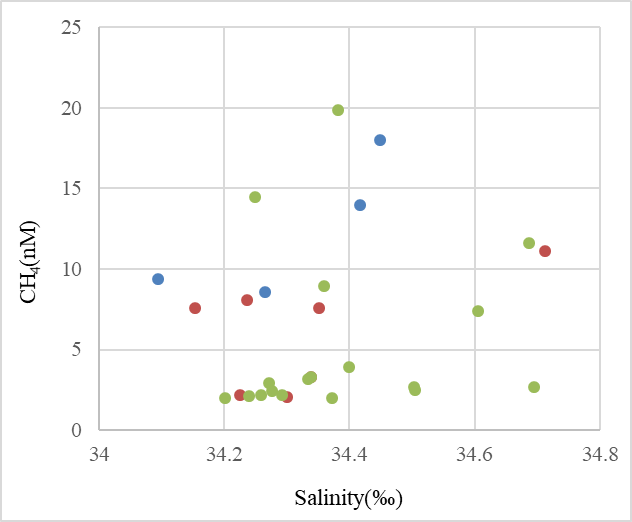


Supplementary Figure S2.


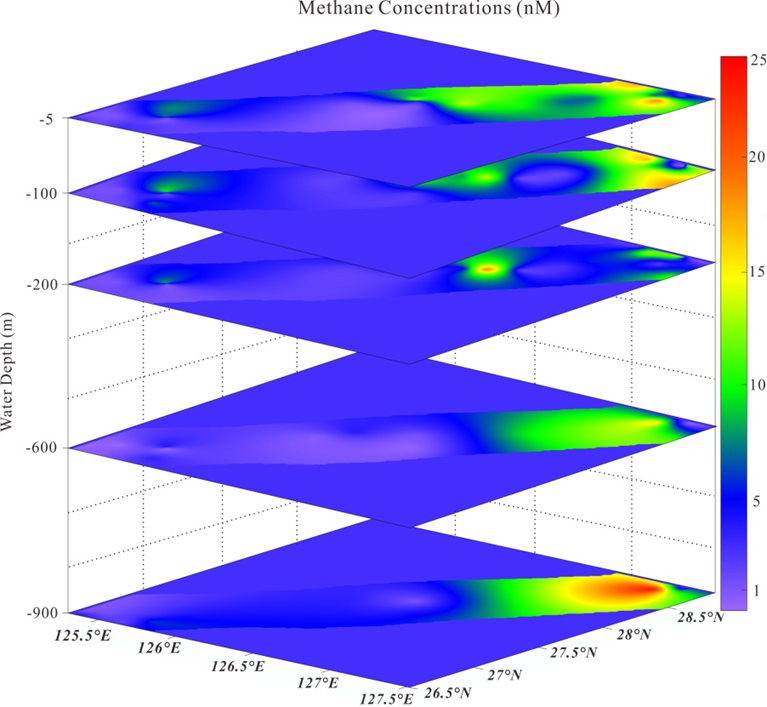


Supplementary Figure S3


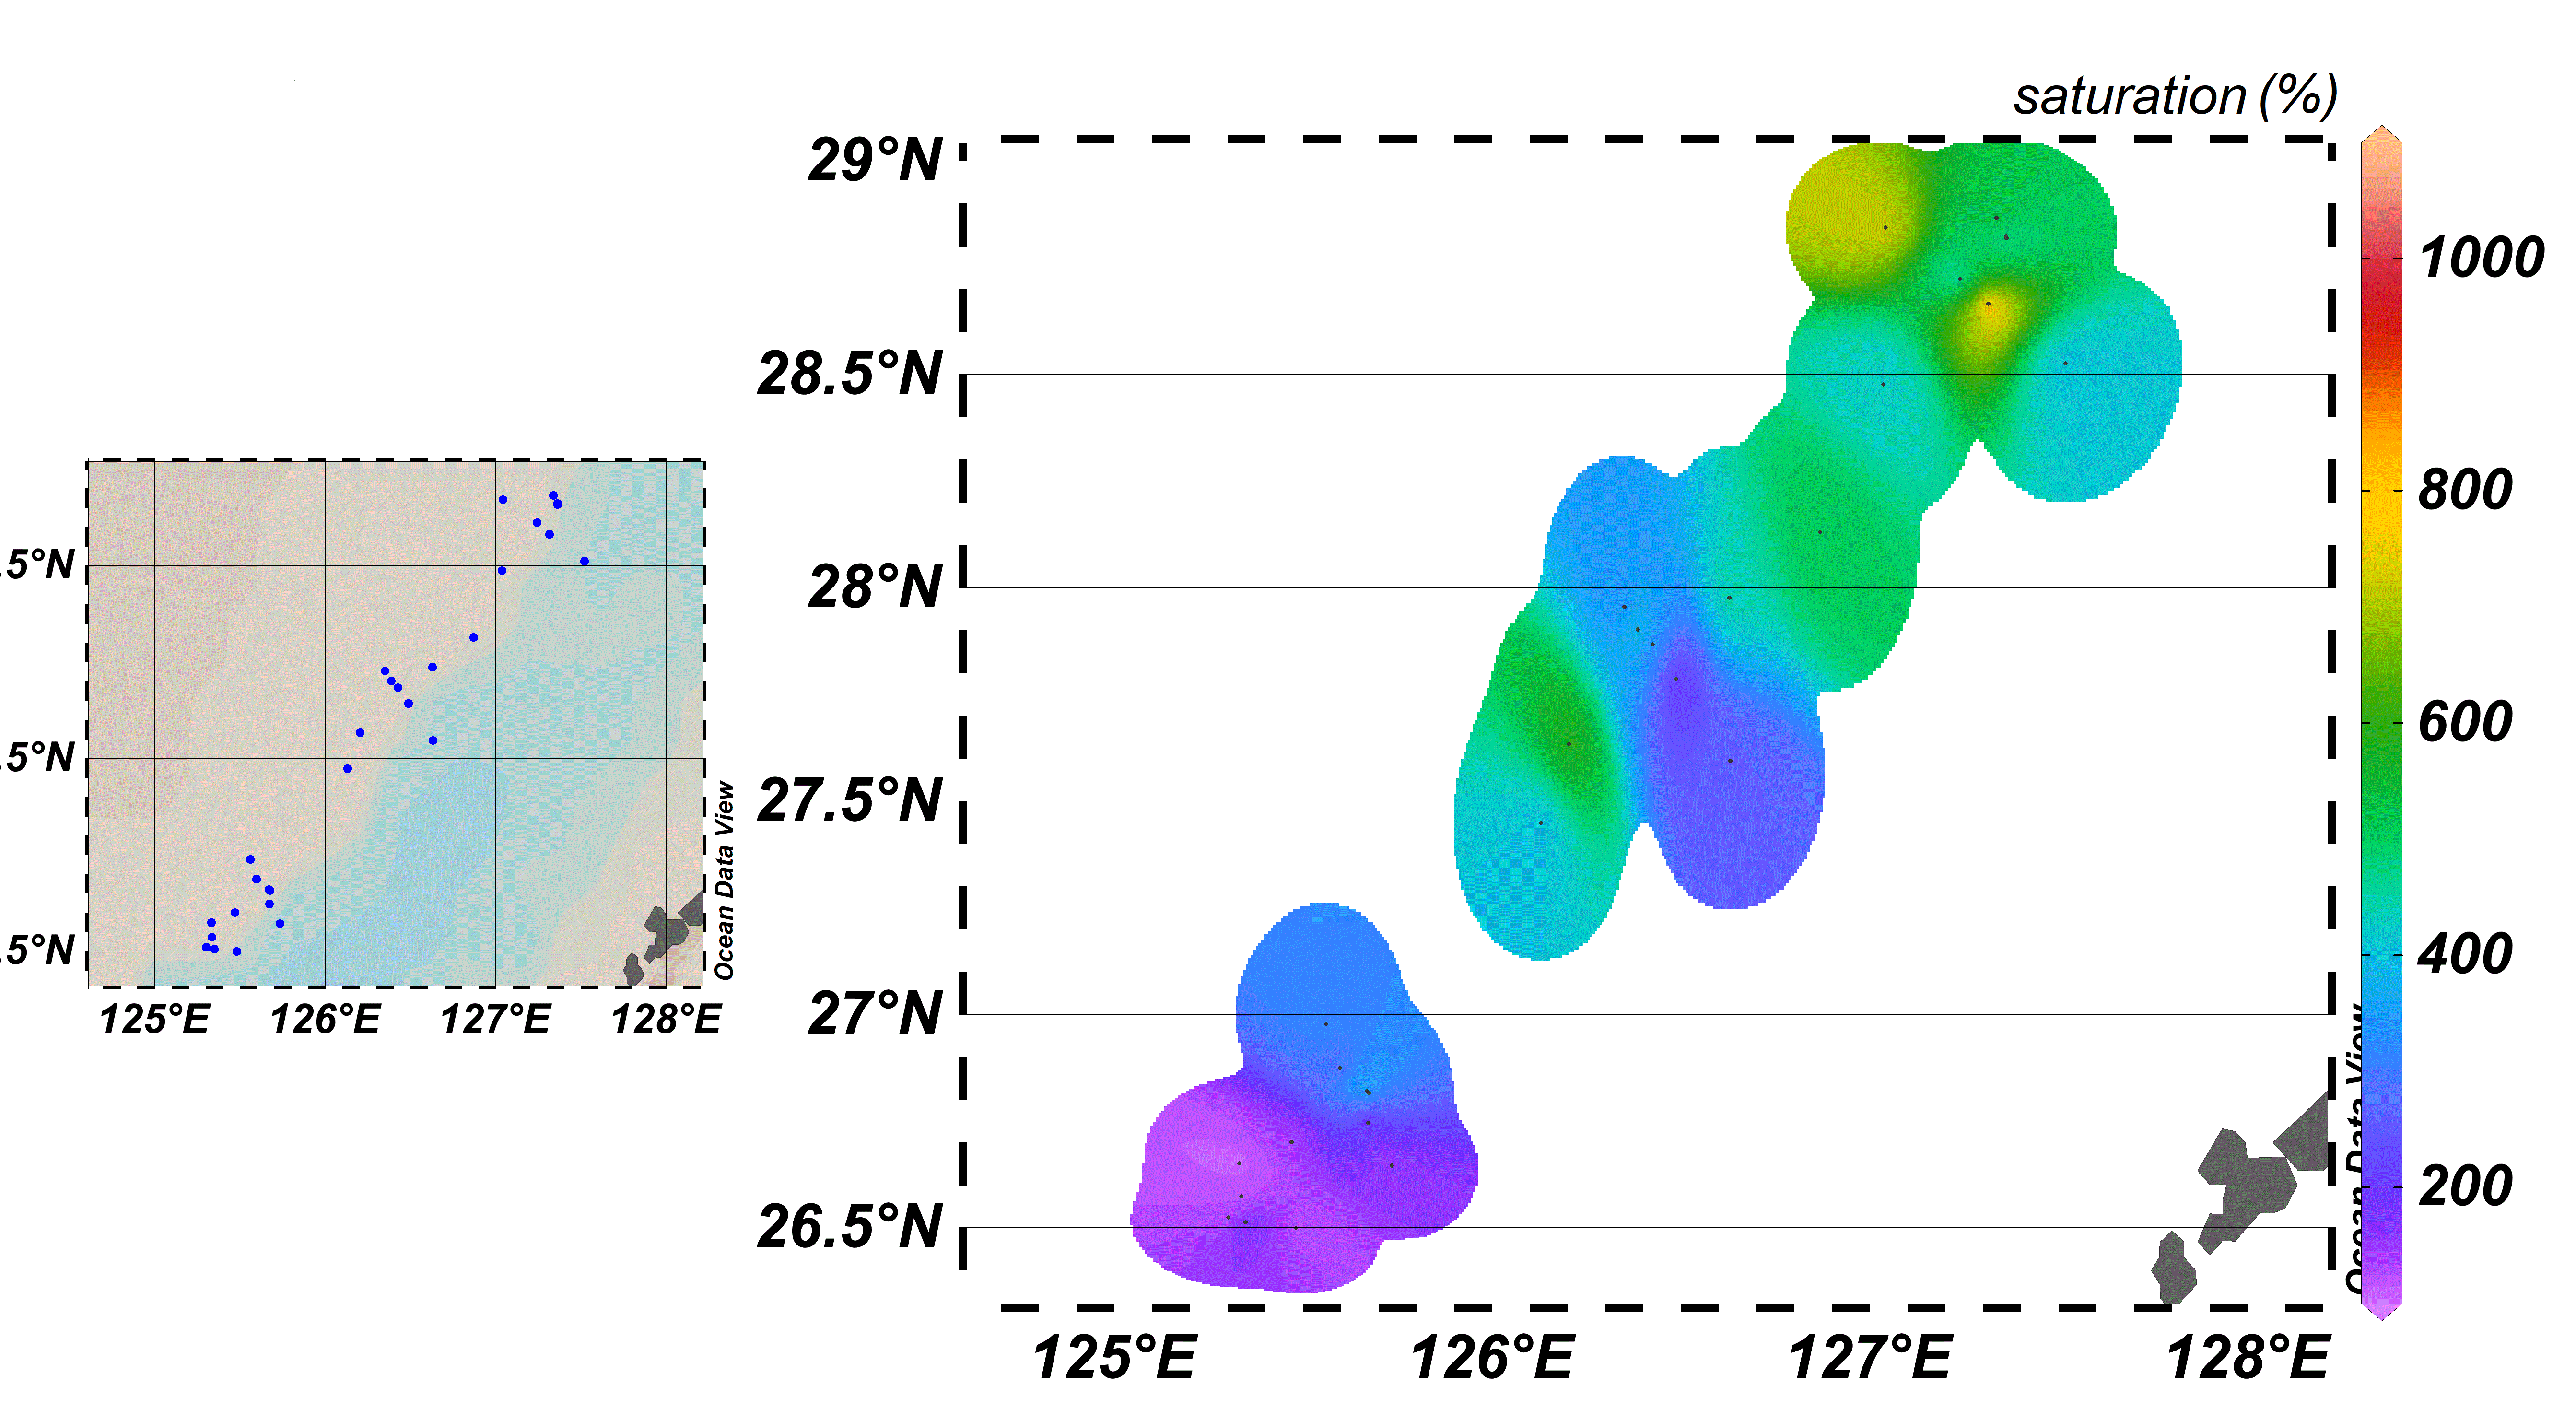

Supplement: Supplementary file 1 [file 24743390]
